# Supplementary material for: Post-glacial flooding of the Bering Land Bridge dated to 11 cal ka BP based on new geophysical and sediment records
Source: Copernicus journal article supplement (doi:10.5194/cp-13-991-2017), 2017-08-01

Supplement of *Clim. Past*, 13, 991–1005, 2017  
<https://doi.org/10.5194/cp-13-991-2017-supplement>  
© Author(s) 2017. This work is distributed under  
the Creative Commons Attribution 3.0 License.

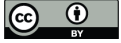

*Supplement of*

## **Post-glacial flooding of the Bering Land Bridge dated to 11 cal ka BP based on new geophysical and sediment records**

**Martin Jakobsson et al.**

*Correspondence to:* Martin Jakobsson ([martin.jakobsson@geo.su.se](mailto:martin.jakobsson@geo.su.se))

The copyright of individual parts of the supplement might differ from the CC BY 3.0 License.

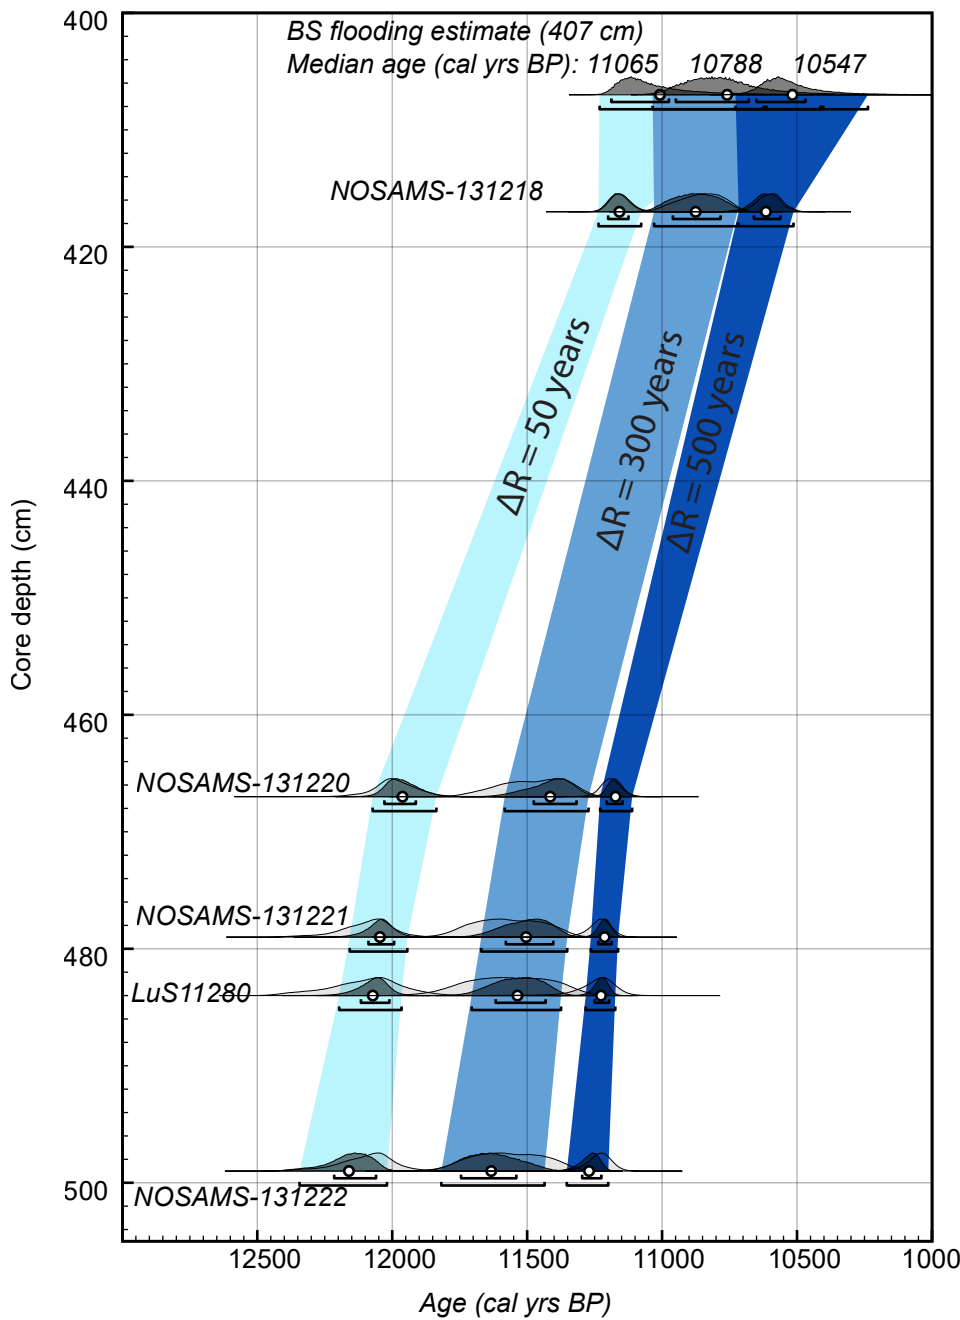

Supplement: Supplementary file 1 [file cp-13-991-2017-supplement.pdf]
